# Supplementary material for: Fingerprinting of Plum (Prunus domestica) Genotypes in Lithuania Using SSR Markers
Source: MDPI journal article supplement (doi:10.3390/plants12071538), 2023-04-03
Supplement: s1 [file s1]

**Tabel S2.** European plum cultivars origin

| No.                                                                                   | Cultivar                              | Country of origin |
|---------------------------------------------------------------------------------------|---------------------------------------|-------------------|
| <b>Accessions from Lithuania genetic resources collection of plum (LT-Plum group)</b> |                                       |                   |
| 1.                                                                                    | Amitar                                | Estonian          |
| 2.                                                                                    | Bluefree                              | USA               |
| 3.                                                                                    | Cacak Beauty                          | Yugoslavia        |
| 4.                                                                                    | Compass                               | USA               |
| 5.                                                                                    | Dabrowicka                            | Poland            |
| 6.                                                                                    | Edinburgine                           | UK                |
| 7.                                                                                    | Eksperimental feltec                  | Sweden            |
| 8.                                                                                    | Eliasova                              | Czechoslovakia    |
| 9.                                                                                    | Favorita del sultano                  | Italy             |
| 10.                                                                                   | Gracious                              | USA               |
| 11.                                                                                   | Hauszwetschge Schufer                 | Germany           |
| 12.                                                                                   | Herman                                | Sweedden          |
| 13.                                                                                   | Italu vengrine                        | Italy             |
| 14.                                                                                   | Ive                                   | Sweedden          |
| 15.                                                                                   | Jakub                                 | Russia            |
| 16.                                                                                   | Jubileum                              | Sweedden          |
| 17.                                                                                   | Julius                                | Estonia           |
| 18.                                                                                   | Kadri                                 | Estonia           |
| 19.                                                                                   | Kometa                                | Russia            |
| 20.                                                                                   | Kose otiec                            | Russia            |
| 21.                                                                                   | Lase                                  | Latvia            |
| 22.                                                                                   | Minjona                               | Latvia            |
| 23.                                                                                   | Oneida                                | Italy             |
| 24.                                                                                   | Ontario                               | USA               |
| 25.                                                                                   | Opal                                  | Sweedden          |
| 26.                                                                                   | Ortenaur                              | Unknown           |
| 27.                                                                                   | Ostromila                             | Bulgaria          |
| 28.                                                                                   | Privet oktiabria                      | Russia            |
| 29.                                                                                   | Queen Victoria                        | UK                |
| 30.                                                                                   | Red coot                              | USA               |
| 31.                                                                                   | Skoroplodnaja                         | Russia            |
| 32.                                                                                   | Stachanovka                           | Russia            |
| 33.                                                                                   | Tarantovskaja Krasavica               | Russia            |
| 34.                                                                                   | Tegera                                | Germany           |
| 35.                                                                                   | Top                                   | Germany           |
| 36.                                                                                   | Uleno renklode                        | France            |
| 37.                                                                                   | Unknown cultivar (100-2)              | Unknown           |
| 38.                                                                                   | Unknown cultivar (1614)               | Unknown           |
| 39.                                                                                   | Unknown cultivar (2245)               | Unknown           |
| 40.                                                                                   | Unknown cultivar (SR Geltona)         | Unknown           |
| 41.                                                                                   | Unknown cultivar from Belarus         | Belarus           |
| 42.                                                                                   | Unknown cultivar from Kedainiai dist. | Unknown           |
| 43.                                                                                   | Unknown cultivar from Siauliai dist.  | Unknown           |
| 44.                                                                                   | Unknown cultivar from Russia          | Russia            |

|                                                           |                                                |           |
|-----------------------------------------------------------|------------------------------------------------|-----------|
| 45.                                                       | Unknown cultivar from Sweeden<br>(Prunus Nr.2) | Sweeden   |
| 46.                                                       | Volzhskaya krasavica                           | Russia    |
| 47.                                                       | Wegierka                                       | Poland    |
| 48.                                                       | Wegierka Zwyczajna                             | Poland    |
| <b>Reference cultivars (R-Plum group)</b>                 |                                                |           |
| 49.                                                       | Anna spath                                     | Germany   |
| 50.                                                       | Hanita                                         | Germany   |
| 51.                                                       | Mirabelle de Nancy                             | France    |
| 52.                                                       | Reine Claude doullins                          | France    |
| 53.                                                       | Stenley                                        | US        |
| 54.                                                       | Valor                                          | Canada    |
| <b>Lithuanian-origin cultivars (LT origin-Plum group)</b> |                                                |           |
| 55.                                                       | Vietine geltonoji                              | Lithuania |
| 56.                                                       | Orija                                          | Lithuania |
| 57.                                                       | Zalioji renklode                               | Lithuania |
| 58.                                                       | Alge                                           | Lithuania |
| 59.                                                       | Vilniaus Vengrine                              | Lithuania |
| 60.                                                       | Aleksona                                       | Lithuania |
| 61.                                                       | Altano renklode                                | Lithuania |
| 62.                                                       | Gyne                                           | Lithuania |
| 63.                                                       | Jure                                           | Lithuania |
| 64.                                                       | Katra                                          | Lithuania |
| 65.                                                       | Kauno vengrine                                 | Lithuania |
| 66.                                                       | Rype                                           | Lithuania |
| 67.                                                       | Skalve                                         | Lithuania |
| 68.                                                       | Staro Vengrine                                 | Lithuania |
