# Supplementary material for: Fingerprinting of Plum (Prunus domestica) Genotypes in Lithuania Using SSR Markers
Source: MDPI journal article supplement (doi:10.3390/plants12071538), 2023-04-03
Supplement: s1 [file s1]

**Table S3.** Parental forms of hybrids

| No. | Hybrid number | Parental Forms                        |
|-----|---------------|---------------------------------------|
| 1.  | PL-202        | Amitar × Jure                         |
| 2.  | PL-211        | Free pollination of Cacanska najbolja |
| 3.  | PL-212        | Amitar × Jure                         |
| 4.  | PL-213        | Amitar × Jure                         |
| 5.  | PL-214        | Cacanska najbolja × Jure              |
| 6.  | PL-215        | Vilniaus Vengrine × Harmonija         |
| 7.  | PL-216        | Vilniaus Vengrine × Jure              |
| 8.  | PL-217        | Free pollination of Cacanska najbolja |
| 9.  | PL-218        | Free pollination of Cacanska najbolja |
| 10. | PL-219        | Free pollination of Cacanska najbolja |
| 11. | PL-220        | Aleksona × Harmonija                  |
| 12. | PL-221        | Aleksona × Harmonija                  |
| 13. | PL-222        | Aleksona × Jure                       |
| 14. | PL-223        | Harmonija × Jure                      |
| 15. | PL-224        | Free pollination of I-1546            |
| 16. | PL-225        | Free pollination of I-1546            |
| 17. | PL-226        | Free pollination of Jojo              |
| 18. | PL-236        | Aleksona × Jure                       |
| 19. | PL-237        | Dabrowicka × Jure                     |
| 20. | PL-238        | Vilniaus Vengrine × Jure              |
| 21. | PL-239        | Vilniaus Vengrine × Jure              |
| 22. | PL-241        | Vilniaus Vengrine × Harmonija         |
| 23. | PL-242        | Cacanska najbolja × Jure              |
| 24. | PL-243        | Aleksona × Jure                       |
| 25. | PL-244        | Tarantovskaja krasavica × Jure        |
| 26. | PL-245        | Dabrowicka × Jure                     |
| 27. | PL-246        | Aleksona × Harmonija                  |
| 28. | PL-247        | Aleksona × Harmonija                  |
| 29. | PL-248        | Aleksona × Jure                       |
| 30. | PL-249        | 2134 × Harmonija                      |
| 31. | PL-250        | Harmonija × Jure                      |
| 32. | PL-251        | Aleksona × Jure                       |
| 33. | PL-252        | 6002a × Jure                          |
| 34. | PL-253        | Free pollination of I-1546            |
| 35. | PL-254        | Aleksona × Harmonija                  |
| 36. | PL-270        | Free pollination of Amers             |
| 37. | PL-293        | Free pollination of Cacanska najbolja |
| 38. | PL-314        | Free pollination of Dabrowicka        |
| 39. | PL-320        | Free pollination of Dabrowicka        |
